1 **Device-Measured Physical Activity in 3,511 Individuals with Knee or Hip Arthroplasty**

2 Scott R. Small<sup>1,2,3</sup>, Sara Khalid<sup>3</sup>, Andrew J. Price<sup>3</sup>, Aiden Doherty<sup>1,2</sup>

3

4 **Affiliations:**

5 <sup>1</sup>Nuffield Department of Population Health, University of Oxford, UK

6 <sup>2</sup>Big Data Institute, Li Ka Shing Centre for Health Information and Discovery, University of  
7 Oxford, UK

8 <sup>3</sup>Nuffield Department of Orthopaedics, Rheumatology and Musculoskeletal Sciences,  
9 University of Oxford, UK

10

11 **Correspondence to:**

12 Aiden Doherty, PhD

13 Professor of Biomedical Informatics

14 University of Oxford

15 Nuffield Department of Population Health

16 Big Data Institute, Old Road Campus

17 Oxford, UK OX3 7LF

18 Email: [aiden.doherty@ndph.ox.ac.uk](mailto:aiden.doherty@ndph.ox.ac.uk)

19

20 **Abstract**

21 **Background:** Physical activity is a key contributor to overall health, with low activity levels  
22 associated with a higher risk of all-cause mortality. Hip and knee arthroplasty aims to reduce  
23 joint pain, increasing functional mobility and the ability to be more physically active. However,  
24 the degree to which arthroplasty is associated with higher physical activity is unclear. The  
25 current study sought to assess the association of hip and knee arthroplasty with objectively  
26 measured physical activity.

27 **Methods:** This cross-sectional study analysed seven days of wrist-worn accelerometer data  
28 collected in 2013-2016 from UK Biobank participants (aged 43-78), with a median 6.8 years  
29 of follow-up. From a cohort of 94,794 participants with valid accelerometer wear time and  
30 complete self-reported data, electronic health records were used to identify 3,511  
31 participants having undergone primary or revision hip or knee arthroplasty and 68,450 non-  
32 arthritic controls. Multivariable linear regression was performed to assess activity in terms of  
33 steps, cadence, acceleration, and behavioural classification between end-stage arthritic and  
34 >12 month postoperative cohorts, controlling for demographic and behavioural confounders.

35 **Findings:** Any combination of one or more hip or knee arthroplasties was associated with  
36 participants taking 694 more daily steps [95% CI: 346, 1,041] ( $p < 0.001$ ) than participants with  
37 end-stage osteoarthritis, though these participants took 542 fewer daily steps [95% CI: 403,  
38 680] ( $p < 0.001$ ) than non-arthritic controls. Unilateral primary hip and knee arthroplasty were  
39 associated with 858 [95% CI: 255, 1,461] ( $p = 0.005$ ) and 879 [95% CI: 209, 1,549] ( $p = 0.010$ )  
40 more steps than end-stage osteoarthritic participants, respectively. Postoperative hip  
41 arthroplasty participants demonstrated levels of moderate-to-vigorous physical activity and  
42 cadence equivalent to non-arthritic controls.

43 **Interpretation:** Hip and knee arthroplasty are associated with higher levels of physical activity  
44 compared to participants with end-stage arthritis. Hip arthroplasty patients, in particular,  
45 approach equivalence with non-arthritic peers in peak cadence and time spent in moderate-  
46 to-vigorous activity. Accelerometer-based activity monitoring of arthroplasty patients may  
47 provide an objective means for the assessment of postoperative recovery and interventional  
48 effectiveness.

49 **Funding Acknowledgements:** This research has been conducted using the UK Biobank  
50 Resource under Application Number 59070. This research was funded in whole or in part by  
51 the Wellcome Trust [223100/Z/21/Z]. For the purpose of open access, the author has applied  
52 a CC-BY public copyright licence to any author accepted manuscript version arising from this  
53 submission. AD and SS are supported by the Wellcome Trust. AD, SS, and SK are supported  
54 by HDR UK, an initiative funded by UK Research and Innovation, Department of Health and  
55 Social Care (England) and the devolved administrations. AD is further supported by Novo  
56 Nordisk, Swiss Re, and by the BHF Centre of Research Excellence (grant number  
57 RE/18/3/34214). SS is further supported by the University of Oxford Clarendon Fund. SK is  
58 further supported by Amgen and UCB BioPharma outside of the scope of this work.  
59 Computational aspects of this research were funded by the National Institute for Health  
60 Research (NIHR) Oxford Biomedical Research Centre (BRC) with additional support from  
61 Health Data Research (HDR) UK and the Wellcome Trust Core Award [grant number  
62 203141/Z/16/Z]. The views expressed are those of the author(s) and not necessarily those of  
63 the NHS, the NIHR or the Department of Health.

64

65

## 66 Introduction

67 Physical activity and mobility are key areas of focus for rehabilitation and perioperative care  
68 to improve joint function and patient quality of life following hip and knee arthroplasty as  
69 treatment for end-stage osteoarthritis. Historically, physical activity in orthopaedic  
70 populations has been assessed primarily through the use of self-reported physical activity  
71 questionnaires<sup>1</sup>. Self-reported physical activity questionnaires suffer from significant recall  
72 bias and have been preferentially replaced with wearable-measured physical activity  
73 assessment in large-scale epidemiological studies<sup>2,3</sup>. However, recent investigations of  
74 wearable-measured physical activity in lower limb arthroplasty clinical cohorts are  
75 predominantly composed of small (n<100), select, or nominally matched cohorts, leading to  
76 conflicting evidence regarding postoperative levels of physical activity following joint  
77 replacement surgery<sup>1,4,5</sup>.

78 While knee and hip arthroplasty are well-established surgical interventions<sup>6,7</sup>, key questions  
79 around physical activity in the clinical population remain unresolved, namely: 1) What is the  
80 impact of end-stage knee or hip osteoarthritis on physical activity compared to a peer non-  
81 arthritic population? 2) Does surgical intervention lead to elevated physical activity levels  
82 after full recovery? 3) Following recovery, do arthroplasty patients reach expected activity  
83 levels equivalent to their non-arthritic peers?

84 We therefore aimed to quantify differences in device-measured physical activity between  
85 non-arthritic controls, participants with end-stage hip or knee osteoarthritis, and participants  
86 having undergone hip or knee arthroplasty. We additionally aimed to address historical  
87 challenges of small sample size, selection bias, and poorly controlled confounders, which  
88 hinder the generalisability of many studies in the current orthopaedic literature.

## 89 **Methods**

### 90 *Activity Measurement*

91 Between 2013 and 2016, over 100,000 UK Biobank participants agreed to wear an Axivity AX3  
92 accelerometer on their dominant wrist, recording at a sampling rate of 100 Hz and resolution  
93 of  $\pm 8 g$  for 24 hours a day for 7 days. Acceleration metrics and machine learning-derived  
94 behavioural classification were retrieved from accelerometer-derived variables from the UK  
95 Biobank dataset<sup>2,8</sup>. The metric of overall acceleration is generated using accelerometer data  
96 processed through a previously described series of resampling, calibration, and lowpass  
97 filtering<sup>2</sup>. A validated random forest and hidden Markov behaviour model was used to  
98 allocate time use into sleep, sedentary, light activity, and moderate-to-vigorous physical  
99 activity (MVPA) classifications<sup>8</sup>. Raw accelerometer data for each participant was additionally  
100 accessed for this study to calculate median daily step count and peak cadence using a hybrid  
101 self-supervised machine learning step detection algorithm that has previously demonstrated  
102 high accuracy in free-living validation<sup>9</sup>. For each participant, valid wear time was considered  
103 a contribution of at least 72 hours of accelerometer wear, in addition to a contribution of at  
104 least one hour of wear during each one-hour period over the 24-hour clock<sup>2</sup>. Participants with  
105 an improbable average acceleration of over 100 mg were excluded from the accelerometry  
106 cohort.

### 107 *Health Data Linkage*

108 National Health Service Hospital Episode Statistics are linked with the UK Biobank, containing  
109 data from 1997 to 2021 for participants in England, 1998 to 2016 in Wales, and 1981 to 2021  
110 in Scotland<sup>10</sup>. Operative codes are listed in the OPCS-4 coding classification system, while  
111 ICD-9 and ICD-10 codes are used for in-hospital admission episode diagnoses. A modified

112 Charlson Comorbidity Index, ranging from 0-50, was used to quantify the multimorbidity  
113 status of all participants<sup>11,12</sup>. Charlson Comorbidity Index was calculated based on ICD-10 data  
114 linkage for each participant within a 5-year lookback window from the start date of the  
115 participant's accelerometer wear period.

#### 116 *Cohort Generation*

117 A flow diagram for study cohort generation is presented in Figure 1. OPCS-4 code definitions  
118 from the National Joint Registry<sup>13</sup> were used to identify participants with any documented  
119 history of primary or revision knee or hip arthroplasty. Participants who wore an  
120 accelerometer less than 12 months after their first hip or knee arthroplasty were considered  
121 still in transient early recovery and were not included in this analysis. Additionally,  
122 participants who received their first hip or knee arthroplasty more than 12 months into the  
123 future following accelerometer wear were also removed.

124 To assess physical activity associated with any combination of primary or revision knee and  
125 hip arthroplasty, two initial study groups were created. The first group consisted of end-stage  
126 osteoarthritic participants who underwent their first primary knee or hip arthroplasty less  
127 than 12 months after accelerometer wear. The second group consisted of participants with  
128 any number of hip or knee arthroplasties, having had their first primary arthroplasty at least  
129 12 months before accelerometer wear. For a second analysis in more clearly defined cohorts,  
130 participants with only a single, unilateral primary knee or hip arthroplasty at any point in their  
131 medical records were selected from the initial cohorts. Participants who had one or more  
132 subsequent revisions of the single primary arthroplasty were also included. Once arthroplasty  
133 patients were identified, cohorts were delineated into four subgroups: end-stage unilateral  
134 knee osteoarthritis with no arthroplasty at the time of accelerometer wear, end-stage

135 unilateral hip osteoarthritis with no arthroplasty at the time of accelerometer wear,  
136 postoperative with a single-site primary or revised knee arthroplasty at the time of  
137 accelerometer wear, and postoperative with a single-site primary or revised hip arthroplasty  
138 at the time of accelerometer wear.

139 A reference cohort of non-arthritic controls was selected for comparison with knee and hip  
140 arthroplasty cohorts. The non-arthritic reference cohort was defined as any UK Biobank  
141 participant with valid accelerometer wear time, no medical record of hip or knee arthroplasty  
142 up to the latest point of health record update, no hip or knee osteoarthritis diagnosis, and no  
143 self-report of chronic (3+ months) of hip pain or knee pain at any follow-up appointment or  
144 interaction with the UK Biobank. All combinations of OPCS and ICD codes used for cohort  
145 generation are listed in the supplemental materials.

#### 146 *Statistical Analysis*

147 Multivariable linear regression was performed to compare physical activity between selected  
148 clinical cohorts. Confounders for adjustment in the regression model were selected from UK  
149 Biobank variables having a significant correlation with physical activity in other  
150 epidemiological studies, including age at the time of wear, sex, ethnic background, education  
151 level, smoking status, alcohol consumption status, Townsend Deprivation Index, wear season,  
152 and Charlson Comorbidity Index<sup>2,8,14</sup>. Due to low overall missingness within the UK Biobank,  
153 a complete-case analysis was performed; participants with missing data in any of the  
154 confounding exposure variables were removed from the analysis. Primary outcome metrics  
155 of interest were step count, peak cadence, overall acceleration, and machine learning  
156 classified moderate-to-vigorous physical activity. Additional measures of machine learning  
157 classified light activity, sedentary activity, and sleep were quantified as a secondary analysis.

158 Separate regression models for each physical activity outcome measure were generated. All  
159 statistical analysis was performed using R (v4.1.0) on the Biomedical Research Cluster at the  
160 University of Oxford Big Data Institute.

## 161 **Results**

162 Baseline demographics of the UK Biobank clinical cohorts with valid accelerometer wear and  
163 self-reported demographic data are presented in Table 1. A total of 7,814 participants were  
164 identified as having any record of knee or hip arthroplasty, with 3,511 having their first  
165 arthroplasty at least 12 months before or within 12 months after accelerometer wear. Of  
166 these, 149 participants contributed valid accelerometer wear less than 12 months before the  
167 primary knee arthroplasty, while 567 participants wore the accelerometer 12 or more months  
168 after the primary knee arthroplasty. A total of 176 participants wore an accelerometer less  
169 than 12 months before a single unilateral hip arthroplasty and 845 wore an accelerometer  
170 more than 12 months after a single hip arthroplasty. To serve as a reference baseline, 68,450  
171 participants were identified as having had no hip or knee arthroplasty, lower limb  
172 osteoarthritis, or chronic hip or knee pain. Consistent with the broader UK Biobank cohort, all  
173 clinical subgroups consisted of primarily white ethnicity with approximately 50% of  
174 participants coming from the least deprived quintile of the broader population of the United  
175 Kingdom.

### 176 *Physical Activity and Mobility Associated with Any Hip or Knee Arthroplasty*

177 Adjusted estimated marginal means of step count, peak cadence, overall acceleration, and  
178 machine learning-derived time spent in MVPA, derived from linear regression models, are  
179 presented in Figure 2. Unadjusted activity levels for each cohort and full regression results  
180 are presented in the supplement (Tables S3-S5). Participants with any end-stage hip or knee



181 arthroplasty took 1,236 fewer daily steps [95% CI: 912, 1,559] ( $p<0.001$ ), had a peak cadence  
182 of 2.9 fewer steps per minute [95% CI: 2.0, 3.7] ( $p<0.001$ ), and participated in 5.8 fewer  
183 minutes per day of MVPA [95% CI: 2.9, 8.6] ( $p<0.001$ ) compared to non-arthritic controls.  
184 Postoperative participants took 542 [95% CI: 403, 680] ( $p<0.001$ ) more daily step counts and  
185 1.8 [95% CI: 1.5, 2.2] ( $p=0.019$ ) more steps per minute peak cadence compared with end-  
186 stage osteoarthritic participants; however, participants who had undergone any combination  
187 of hip or knee arthroplasty were less active than non-arthritic peers in terms of daily step  
188 count, peak cadence, and time spent in MVPA. No statistically significant difference in overall  
189 acceleration was observed in any comparison.

#### 190 *Physical Activity and Mobility Associated with a Single, Unilateral Hip or Knee Arthroplasty*

191 Adjusted estimated marginal means of linear regression-derived step count, peak cadence,  
192 overall acceleration, and machine learning-derived time spent in MVPA are presented in  
193 Figure 3. Full results from the linear regression models are presented in Supplemental Tables  
194 S6 and S7. Following adjustment for covariates, end-stage unilateral knee osteoarthritis was  
195 associated with lower physical activity when compared to the non-arthritic reference cohort,  
196 taking 1,387 fewer daily steps [95% CI: 789, 1,984] ( $p<0.001$ ), a peak cadence of 4.1 [95% CI:  
197 2.7, 5.6] ( $p<0.001$ ) fewer steps per minute, and 6.8 [95% CI: 1.5, 12.0] ( $p=0.012$ ) fewer daily  
198 minutes spent in MVPA. End-stage unilateral hip osteoarthritis was associated with taking  
199 1,134 [584, 1,683] ( $p<0.001$ ) fewer daily steps than controls, but participants had otherwise  
200 statistically similar physical activity to their non-arthritic peers. Unilateral primary hip and  
201 knee arthroplasty were associated with 858 [95% CI: 255, 1,461] ( $p=0.005$ ) and 879 [95% CI:  
202 209, 1,549] ( $p=0.010$ ) more steps than end-stage osteoarthritic participants, respectively.  
203 However, postoperative unilateral knee arthroplasty was associated with 508 [95% CI: 199,

204 816] ( $p=0.001$ ) fewer daily steps, a cadence of 2.8 [95% CI: 2.0, 3.6] ( $p<0.001$ ) fewer steps per  
205 minute, and 2.9 [0.2, 5.6] ( $p=0.037$ ) fewer daily minutes of MVPA compared to controls.  
206 Postoperative unilateral hip arthroplasty was associated with a modest 276 [95% CI: 23, 529]  
207 ( $p=0.033$ ) fewer daily steps than controls, but these participants were otherwise equivalent  
208 to non-arthritic peers in terms of activity and mobility. No difference in physical activity was  
209 observed between any cohorts in terms of overall daily light activity, sedentary behaviour, or  
210 sleep time.

## 211 **Discussion**

212 Our cross-sectional study indicated significantly higher activity in terms of daily step count  
213 following hip and knee arthroplasty when compared to participants with end-stage hip  
214 osteoarthritis. As a result, participants who have undergone surgical intervention  
215 demonstrate only modestly lower or equivalent physical activity compared to their non-  
216 arthritic peers across metrics, with the most room for improvement seen in postoperative  
217 knee arthroplasty cohorts in terms of daily step count, peak cadence, and time spent in  
218 moderate-to-vigorous physical activity.

219 The first objective of this study was to assess the effect of end-stage knee and hip arthritis on  
220 physical activity compared to a non-arthritic peer group. We found that participants with any  
221 end-stage hip or knee osteoarthritis took 13% fewer steps per day, had a 3% slower peak  
222 cadence, and spent 16% fewer minutes per day in moderate-to-vigorous physical activity  
223 compared to non-arthritic peers. When assessing activity in participants with single-site  
224 arthritis, both knee and hip arthritis were associated with lower daily steps. Only end-stage  
225 knee arthritis was associated with lower peak cadence and time spent in moderate-to-  
226 vigorous physical activity compared to non-arthritic controls. Prior, smaller studies of

227 objectively measured physical activity in end-stage osteoarthritic patients show similar  
228 patterns, yet greater differences, with end-stage hip or knee osteoarthritis associated with  
229 20-35% fewer steps and active minutes than health controls<sup>15-17</sup>.

230 When comparing postoperative unilateral knee and hip arthroplasty cohorts to end-stage  
231 arthritic cohorts, our results indicate 11% and 10% higher daily step count in the  
232 postoperative unilateral knee and hip arthroplasty cohorts, respectively. Prior evidence as to  
233 whether physical activity increases for the average patient following surgery has been mixed,  
234 as most historical investigations of physical activity in patients with hip and knee arthroplasty  
235 have been conducted using self-reported questionnaires limited by well-documented  
236 methodological biases.<sup>1,3</sup> In these cases, many patients report increased physical activity and  
237 functional improvement on patient reported outcome measures; however, the majority of  
238 studies using objectively measured activity describe only minimal gains in postoperative  
239 activity and step count in small patient populations<sup>1,18,19</sup>. In a longitudinal study using a  
240 consumer-grade activity tracker, Christensen et al.<sup>5</sup> reported a return to preoperative step  
241 count within one month following unilateral knee arthroplasty in 1,005 total knee  
242 arthroplasty patients, culminating in approximately 40% more daily steps at one-year follow-  
243 up. This increase is substantially higher than studies of previous cohorts, and may be a result  
244 of selection bias by including only participants who owned Apple Watch-compatible iPhones  
245 at targeted surgical centres. A more moderate difference in activity levels between  
246 postoperative and end-stage arthritic cohorts was observed in the current study, which may  
247 result, in part, from the UK Biobank drawing health records from surgical interventions  
248 performed across the breadth of public healthcare facilities.

249 An important target outcome for successful lower limb arthroplasty is the restoration of joint  
250 mobility, enabling the potential of increased physical activity and improved overall patient  
251 health compared to before surgical intervention. Physical activity is well correlated with  
252 health outcomes and an increase of 1,000 steps per day has been attributed to a lower risk of  
253 cardiovascular disease and all-cause mortality<sup>20</sup>. Compared to their non-arthritic peers,  
254 postoperative unilateral knee arthroplasty was associated with taking 5% fewer daily steps,  
255 2.8 fewer steps per minute slower cadence, and 8% less time in MVPA. Conversely,  
256 postoperative unilateral hip arthroplasty was associated with only 3% fewer daily steps and  
257 equivalent peak cadence and levels of MVPA compared to non-arthritic controls. Other  
258 comparisons have been drawn in terms of physical activity levels between postoperative hip  
259 or knee arthroplasty patients and non-arthritic controls, reporting significantly lower activity  
260 in these patients compared to their peers<sup>21-26</sup>. Walker et al.<sup>24</sup> and Kersten et al.<sup>26</sup> reported  
261 that activity in postoperative knee patients may still be up to 20% less than in healthy controls.  
262 Whereas most prior studies of physical activity in orthopaedic populations to healthy controls  
263 have generally matched only on age and sex<sup>1,23</sup>, the current analysis adjusts for other  
264 confounders of activity, including body mass index, education, alcohol intake, smoking status,  
265 and medical comorbidities<sup>8</sup>.

266 In this study, daily step count, time spent in MVPA and peak cadence metrics demonstrated  
267 sensitivity to lower limb osteoarthritis and surgical intervention, yet no differences in physical  
268 activity were observed between any cohorts when comparing overall acceleration magnitude.  
269 While overall acceleration is a validated surrogate for general activity level<sup>27</sup>, the inclusion of  
270 mobility-centric metrics like step count and peak cadence may enable more nuanced analysis  
271 in certain populations. This may imply that orthopaedic surgical intervention affects overall  
272 mobility but does not greatly affect behavioural patterns of sleep, sedentary time, and light

273 activity. In future studies, the inclusion of step metrics and machine learning classification of  
274 behaviours, such as time spent in MVPA, may elucidate insights into physical activity not  
275 distinguished by acceleration alone.

276 This study incorporates a highly accurate free-living validated step-counting algorithm  
277 designed from the same research-grade accelerometer as used in the UK Biobank; however,  
278 some caution may need to be taken when applying a step detection algorithm to orthopaedic  
279 clinical populations<sup>28-30</sup>, as up to 16% of arthroplasty patients have at least some dependence  
280 on walking aids<sup>31</sup>. Because assistance is generally minor<sup>31-33</sup>, usually consisting of a single  
281 cane<sup>33</sup>, the effect on step count accuracy will be small compared to more substantial gait  
282 aids<sup>30</sup>. Lower step count in participants with end-stage osteoarthritis may include some  
283 underestimation bias due to walking aid use. Even so, this increased postoperative step count  
284 retains and supports the overall conclusion of improved functional mobility (increased activity  
285 and/or reduced levels of aid) in postoperative arthroplasty patients. Of note, the UK Biobank  
286 health record linkage lacks data on privately accessed medical services, thus an unknown level  
287 of missing operative records from private healthcare facilities are unaccounted for,  
288 particularly within the non-arthritic control population. The use of additional ICD diagnostic  
289 codes alongside the conservative exclusion of any participants with self-reported knee or hip  
290 pain was incorporated to minimise the inclusion of hidden operative cases within the cohort.  
291 The current study is a cross-sectional analysis and does not enable patient-level assessment  
292 of physical activity before and after knee or hip arthroplasty. Through physical activity  
293 monitoring and digital health interventions, opportunities exist for further carefully designed  
294 longitudinal evaluation of postoperative recovery to increase activity levels, improve mobility  
295 and identify patient outliers in need of further intervention.

296 **Conclusion**

297 This is the largest investigation of wearable-measured physical activity in hip or knee  
298 arthroplasty patients to date, with well-established health record linkage and detailed  
299 demographic data allowing for adjustment across multiple confounders of physical activity.  
300 The results highlight the significantly higher levels of activity in postoperative compared to  
301 end-stage osteoarthritic cohorts, with unilateral knee and hip arthroplasty patients taking  
302 approximately 850 steps per day more than respective end-stage arthritic peers. However,  
303 postoperative knee arthroplasty was associated with taking fewer steps per day than non-  
304 arthritic peers, providing motivation for further work in developing rehabilitation programs  
305 focused on improving physical activity, particularly in knee patients.

306 **Data Availability**

307 All data used in this study was collected or derived from the UK Biobank. Our open-source  
308 accelerometer processing tool to calculate validated step count from raw accelerometry  
309 data is available for use at <https://github.com/OxWearables/stepcount>.

310

311

312

313

314

315

316

## 317 References

- 318 1 Paxton RJ, Melanson EL, Stevens-Lapsley JE, Christiansen CL, Christi-Ansen CL.  
319 Physical activity after total knee arthroplasty: A critical review. *World J Orthop* 2015;  
320 **6**: 614–22.
- 321 2 Doherty A, Jackson D, Hammerla N, *et al.* Large scale population assessment of  
322 physical activity using wrist worn accelerometers: The UK biobank study. *PLoS One*  
323 2017; **12**: 1–14.
- 324 3 Troiano RP, Stamatakis E, Bull FC. How can global physical activity surveillance adapt  
325 to evolving physical activity guidelines? Needs, challenges and future directions. *Br. J.*  
326 *Sports Med.* 2020; **54**: 1468–73.
- 327 4 Small SR, Bullock GS, Khalid S, Barker K, Trivella M, Price AJ. Current clinical utilisation  
328 of wearable motion sensors for the assessment of outcome following knee  
329 arthroplasty: a scoping review. *BMJ Open.* 2019; **9**: e033832.
- 330 5 Christensen JC, Blackburn BE, Anderson LA, *et al.* Recovery Curve for Patient Reported  
331 Outcomes and Objective Physical Activity After Primary Total Knee Arthroplasty—A  
332 Multicenter Study Using Wearable Technology. *J Arthroplasty* 2023; published online  
333 March 28. DOI:10.1016/j.arth.2023.03.060.
- 334 6 Learmonth ID, Young C, Rorabeck C. The operation of the century: total hip  
335 replacement. *Lancet* 2007; **370**: 1508–19.
- 336 7 Rand JA, Ilstrup DM. Survivorship analysis of total knee arthroplasty. Cumulative rates  
337 of survival of 9200 total knee arthroplasties. *J Bone Jt Surg - Ser A* 1991; **73**: 397–409.
- 338 8 Walmsley R, Chan S, Smith-Byrne K, *et al.* Reallocation of time between device-  
339 measured movement behaviours and risk of incident cardiovascular disease. *BMJ*  
340 Publishing Group Ltd and British Association of Sport and Exercise Medicine, 2021.
- 341 9 Small SR, Chan S, Walmsley R, *et al.* Development and Validation of a Machine  
342 Learning Wrist-worn Step Detection Algorithm with Deployment in the UK Biobank.  
343 *medRxiv* 2023; : 2023.02.20.23285750.
- 344 10 UK Biobank. UK Biobank Hospital inpatient data. 2020 <http://www.ukbiobank.ac.uk/>  
345 (accessed Sept 21, 2021).
- 346 11 NHS Digital. Indicator Specification: Summary Hospital-level Mortality Indicator. 2014.
- 347 12 Charlson ME, Pompei P, Ales KL, MacKenzie CR. A new method of classifying  
348 prognostic comorbidity in longitudinal studies: Development and validation. *J Chronic*  
349 *Dis* 1987; **40**: 373–83.
- 350 13 National Joint Registry for England Wales Northern Ireland and the Isle of Man. OPCS  
351 Codes relevant to procedures recorded on the NJR v5. 2017; : 1–16.
- 352 14 Chudasama Y V., Khunti KK, Zaccardi F, *et al.* Physical activity, multimorbidity, and life  
353 expectancy: a UK Biobank longitudinal study. *BMC Med* 2019; **17**: 108.
- 354 15 Winter CC, Brandes M, Müller C, *et al.* Walking ability during daily life in patients with

- 355 osteoarthritis of the knee or the hip and lumbar spinal stenosis: A cross sectional  
356 study. *BMC Musculoskelet Disord* 2010; **11**. DOI:10.1186/1471-2474-11-233.
- 357 16 de Groot IBB, Bussmann JBB, Stam HJJ, Verhaar JANAN. Actual everyday physical  
358 activity in patients with end-stage hip or knee osteoarthritis compared with healthy  
359 controls. *Osteoarthr Cartil* 2008; **16**: 436–42.
- 360 17 Watanabe H, Urabe K, Takahira N, *et al*. Quality of Life, Knee Function, and Physical  
361 Activity in Japanese Elderly Women with Early-Stage Knee Osteoarthritis.  
362 <http://dx.doi.org/101177/230949901001800107> 2010; **18**: 31–4.
- 363 18 Arnold JB, Walters JL, Ferrar KE, J.B. A, J.L. W. Does Physical Activity Increase After  
364 Total Hip or Knee Arthroplasty for Osteoarthritis? A Systematic Review. *J Orthop Sport*  
365 *Phys Ther* 2016; **46**: 431–42.
- 366 19 Höll S, Blum A, Gosheger G, Dieckmann R, Winter C, Rosenbaum D. Clinical outcome  
367 and physical activity measured with StepWatch 3™ Activity Monitor after minimally  
368 invasive total hip arthroplasty. *J Orthop Surg Res* 2018; **13**. DOI:10.1186/S13018-018-  
369 0775-4.
- 370 20 Hall KS, Hyde ET, Bassett DR, *et al*. Systematic review of the prospective association of  
371 daily step counts with risk of mortality, cardiovascular disease, and dysglycemia. *Int J*  
372 *Behav Nutr Phys Act* 2020; **17**. DOI:10.1186/s12966-020-00978-9.
- 373 21 Cooper NA, Rakel BA, Zimmerman B, *et al*. Predictors of multidimensional functional  
374 outcomes after total knee arthroplasty. *J Orthop Res* 2017; **35**: 2790–8.
- 375 22 Dugaard R, Tjur M, Sliepen M, Lipperts M, Grimm B, Mechlenburg I. Are patients  
376 with knee osteoarthritis and patients with knee joint replacement as physically active  
377 as healthy persons? *J Orthop Transl* 2018; **14**: 8–15.
- 378 23 Lützner C, Kirschner S, Lützner J. Patient Activity After TKA Depends on Patient-  
379 specific Parameters. *Clin Orthop Relat Res* 2014; **472**: 3933–40.
- 380 24 Walker DJ, Heslop PS, Chandler C, Pinder IM. Measured ambulation and self-reported  
381 health status following total joint replacement for the osteoarthritic knee.  
382 *Rheumatology* 2002; **41**: 755–8.
- 383 25 Vissers MM, Bussmann JBJJ, de Groot IB, *et al*. Walking and chair rising performed in  
384 the daily life situation before and after total hip arthroplasty. *Osteoarthr Cartil* 2011;  
385 **19**: 1102–7.
- 386 26 Kersten RFMR, Stevens M, van Raay JJAM, Bulstra SK, van den Akker-Scheek I.  
387 Habitual physical activity after total knee replacement. *Phys Ther* 2012; **92**: 1109–16.
- 388 27 White T, Westgate K, Hollidge S, *et al*. Estimating energy expenditure from wrist and  
389 thigh accelerometry in free-living adults: a doubly labelled water study. *Int J Obes*  
390 2019; : 370247.
- 391 28 Modave F, Guo Y, Bian J, *et al*. Mobile device accuracy for step counting across age  
392 groups. *JMIR mHealth uHealth* 2017; **5**. DOI:10.2196/mhealth.7870.
- 393 29 Simpson LA, Eng JJ, Klassen TD, *et al*. Capturing step counts at slow walking speeds in



- 394 older adults: Comparison of ankle and waist placement of measuring device. *J Rehabil*  
395 *Med* 2015; **47**: 830–5.
- 396 30 Kooner P, Schubert T, Howard JL, Lanting BA, Teeter MG, Vasarhelyi EM. Evaluation of  
397 the effect of gait aids, such as canes, crutches, and walkers, on the accuracy of step  
398 counters in healthy individuals. *Orthop Res Rev* 2021; **13**: 1–8.
- 399 31 David G Lewallen JAS. Dependence on Walking Aids and Patient-Reported Outcomes  
400 after Total Knee Arthroplasty. *J Arthritis* 2015; **04**: 2–6.
- 401 32 Gabr A, Withers D, Pope J, Santini A. Functional outcome of staged bilateral knee  
402 replacements. *Ann R Coll Surg Engl* 2011; **93**: 537–41.
- 403 33 Pua YH, Seah FJT, Clark RA, Lian-Li Poon C, Tan JWM, Chong HC. Factors associated  
404 with gait speed recovery after total knee arthroplasty: A longitudinal study. *Semin*  
405 *Arthritis Rheum* 2017; **46**: 544–51.
- 406 34 Yousaf S, Bonsall A. UK Data Service Impact Ambassadors Workshop With The  
407 Department for Education Jointly organised by The UK Data Service and The  
408 Department for Education (DfE) UK Townsend Deprivation Scores from 2011 census  
409 data. 2017.
- 410

Table 1: Study cohort demographics

| Characteristic                             | Any Hip or Knee Arthroplasty <sup>†</sup> |                                | Single Knee Arthroplasty <sup>*</sup> |                                | Single Hip Arthroplasty <sup>*</sup> |                                | Non-Arthritic Cohort |
|--------------------------------------------|-------------------------------------------|--------------------------------|---------------------------------------|--------------------------------|--------------------------------------|--------------------------------|----------------------|
|                                            | End-Stage Arthritis <sup>#</sup>          | 12+ Months Postop <sup>‡</sup> | End-Stage Arthritis <sup>#</sup>      | 12+ Months Postop <sup>‡</sup> | End-Stage Arthritis <sup>#</sup>     | 12+ Months Postop <sup>‡</sup> |                      |
| Overall, N (%)                             | 513 (100)                                 | 2,998 (100)                    | 149 (100)                             | 567 (100)                      | 176 (100)                            | 845 (100)                      | 68,450 (100)         |
| Sex, N (%)                                 |                                           |                                |                                       |                                |                                      |                                |                      |
| Female                                     | 301 (59)                                  | 1,720 (57)                     | 79 (53)                               | 304 (54)                       | 103 (59)                             | 481 (57)                       | 38,203 (56)          |
| Male                                       | 212 (41)                                  | 1,278 (43)                     | 70 (47)                               | 263 (46)                       | 73 (41)                              | 364 (43)                       | 30,247 (44)          |
| Age, Median [IQR]                          | 67.9 [64.0–71.4]                          | 68.8 [64.9–72.1]               | 68.3 [65.0–71.6]                      | 69.3 [65.7–72.3]               | 67.6 [62.7–71.5]                     | 68.3 [64.2–71.8]               | 62.6 [55.4–68.1]     |
| Ethnicity, N (%)                           |                                           |                                |                                       |                                |                                      |                                |                      |
| White                                      | 508 (99)                                  | 2,954 (99)                     | 146 (98)                              | 555 (98)                       | 176 (100)                            | 836 (99)                       | 66,276 (97)          |
| Non-white                                  | 5 (1)                                     | 44 (1)                         | 3 (2)                                 | 12 (2)                         | 0 (0)                                | 9 (1)                          | 2,174 (3)            |
| Body Mass Index, Median [IQR]              | 28.2 [25.2–31.7]                          | 28.3 [25.5–31.7]               | 28.3 [26.0–31.8]                      | 29.2 [26.4–32.9]               | 26.8 [24.7–29.6]                     | 26.7 [24.2–29.8]               | 25.6 [23.3–28.4]     |
| CCI, Median [IQR]                          | 0 [0–0]                                   | 0 [0–4]                        | 0 [0–4]                               | 0 [0–4]                        | 0 [0–0]                              | 0 [0–0]                        | 0 [0–0]              |
| Wear Season, N (%)                         |                                           |                                |                                       |                                |                                      |                                |                      |
| Spring                                     | 121 (24)                                  | 653 (22)                       | 37 (25)                               | 113 (20)                       | 42 (24)                              | 175 (21)                       | 15,819 (23)          |
| Summer                                     | 152 (30)                                  | 823 (27)                       | 40 (27)                               | 159 (28)                       | 53 (30)                              | 232 (27)                       | 18,083 (26)          |
| Autumn                                     | 136 (27)                                  | 898 (30)                       | 39 (26)                               | 177 (31)                       | 48 (27)                              | 263 (31)                       | 20,195 (30)          |
| Winter                                     | 104 (20)                                  | 624 (21)                       | 33 (22)                               | 118 (21)                       | 33 (19)                              | 175 (21)                       | 14,353 (21)          |
| Education, N (%)                           |                                           |                                |                                       |                                |                                      |                                |                      |
| School Leaver                              | 152 (30)                                  | 924 (31)                       | 39 (26)                               | 206 (36)                       | 57 (32)                              | 250 (30)                       | 14,823 (22)          |
| Further Education                          | 170 (33)                                  | 1,066 (36)                     | 58 (39)                               | 210 (37)                       | 39 (22)                              | 274 (32)                       | 22,292 (33)          |
| Higher Education                           | 191 (37)                                  | 1,008 (34)                     | 52 (35)                               | 151 (27)                       | 80 (45)                              | 321 (38)                       | 31,335 (46)          |
| Smoking Status, N (%)                      |                                           |                                |                                       |                                |                                      |                                |                      |
| Never                                      | 242 (47)                                  | 1,496 (50)                     | 78 (52)                               | 267 (47)                       | 86 (49)                              | 455 (54)                       | 40,354 (59)          |
| Former                                     | 236 (46)                                  | 1,335 (45)                     | 60 (40)                               | 271 (48)                       | 81 (46)                              | 337 (40)                       | 23,463 (34)          |
| Current                                    | 35 (7)                                    | 167 (6)                        | 11 (7)                                | 29 (5)                         | 9 (5)                                | 53 (6)                         | 4,633 (7)            |
| Alcohol Consumption, N (%)                 |                                           |                                |                                       |                                |                                      |                                |                      |
| Never                                      | 29 (6)                                    | 205 (7)                        | 8 (5)                                 | 40 (7)                         | 9 (5)                                | 46 (5)                         | 3,748 (5)            |
| < 3 Days Per Week                          | 233 (45)                                  | 1,351 (45)                     | 69 (46)                               | 270 (48)                       | 74 (42)                              | 355 (42)                       | 30,803 (45)          |
| 3+ Days Per Week                           | 251 (49)                                  | 1,442 (48)                     | 72 (48)                               | 257 (45)                       | 93 (53)                              | 444 (53)                       | 33,899 (50)          |
| Townsend Deprivation <sup>3d</sup> , N (%) |                                           |                                |                                       |                                |                                      |                                |                      |
| Least Deprived                             | 251 (49)                                  | 1,551 (52)                     | 71 (48)                               | 280 (49)                       | 83 (47)                              | 458 (54)                       | 34,638 (51)          |
| 2 <sup>nd</sup> Quintile                   | 136 (27)                                  | 673 (22)                       | 43 (29)                               | 126 (22)                       | 47 (27)                              | 182 (22)                       | 15,385 (22)          |
| 3 <sup>rd</sup> Quintile                   | 64 (12)                                   | 400 (13)                       | 15 (10)                               | 89 (16)                        | 23 (13)                              | 110 (13)                       | 9,709 (14)           |
| 4 <sup>th</sup> Quintile                   | 46 (9)                                    | 278 (9)                        | 14 (9)                                | 59 (10)                        | 15 (9)                               | 66 (8)                         | 6,490 (9)            |
| Most Deprived                              | 16 (3)                                    | 96 (3)                         | 6 (4)                                 | 13 (2)                         | 8 (5)                                | 29 (3)                         | 2,228 (3)            |

Percentages may not add up to 100% due to rounding

CCI: Charlson Comorbidity Index

+ Includes all participants with any combination of primary or revision knee or hip arthroplasties, excluding those who had their first arthroplasty less than 12 months before accelerometer wear (early recoverers), or more than 12 months after accelerometer wear (future first arthroplasty).

\*Single Hip and Single Knee Arthroplasty Cohorts are subsets of the Any Hip or Knee Arthroplasties Cohort as defined in Figure 1

<sup>#</sup> End-stage arthritis is considered having their first arthroplasty within 12 months after accelerometer wear

<sup>‡</sup> Accelerometer wear more than 12 months after the participant's first primary knee or hip arthroplasty

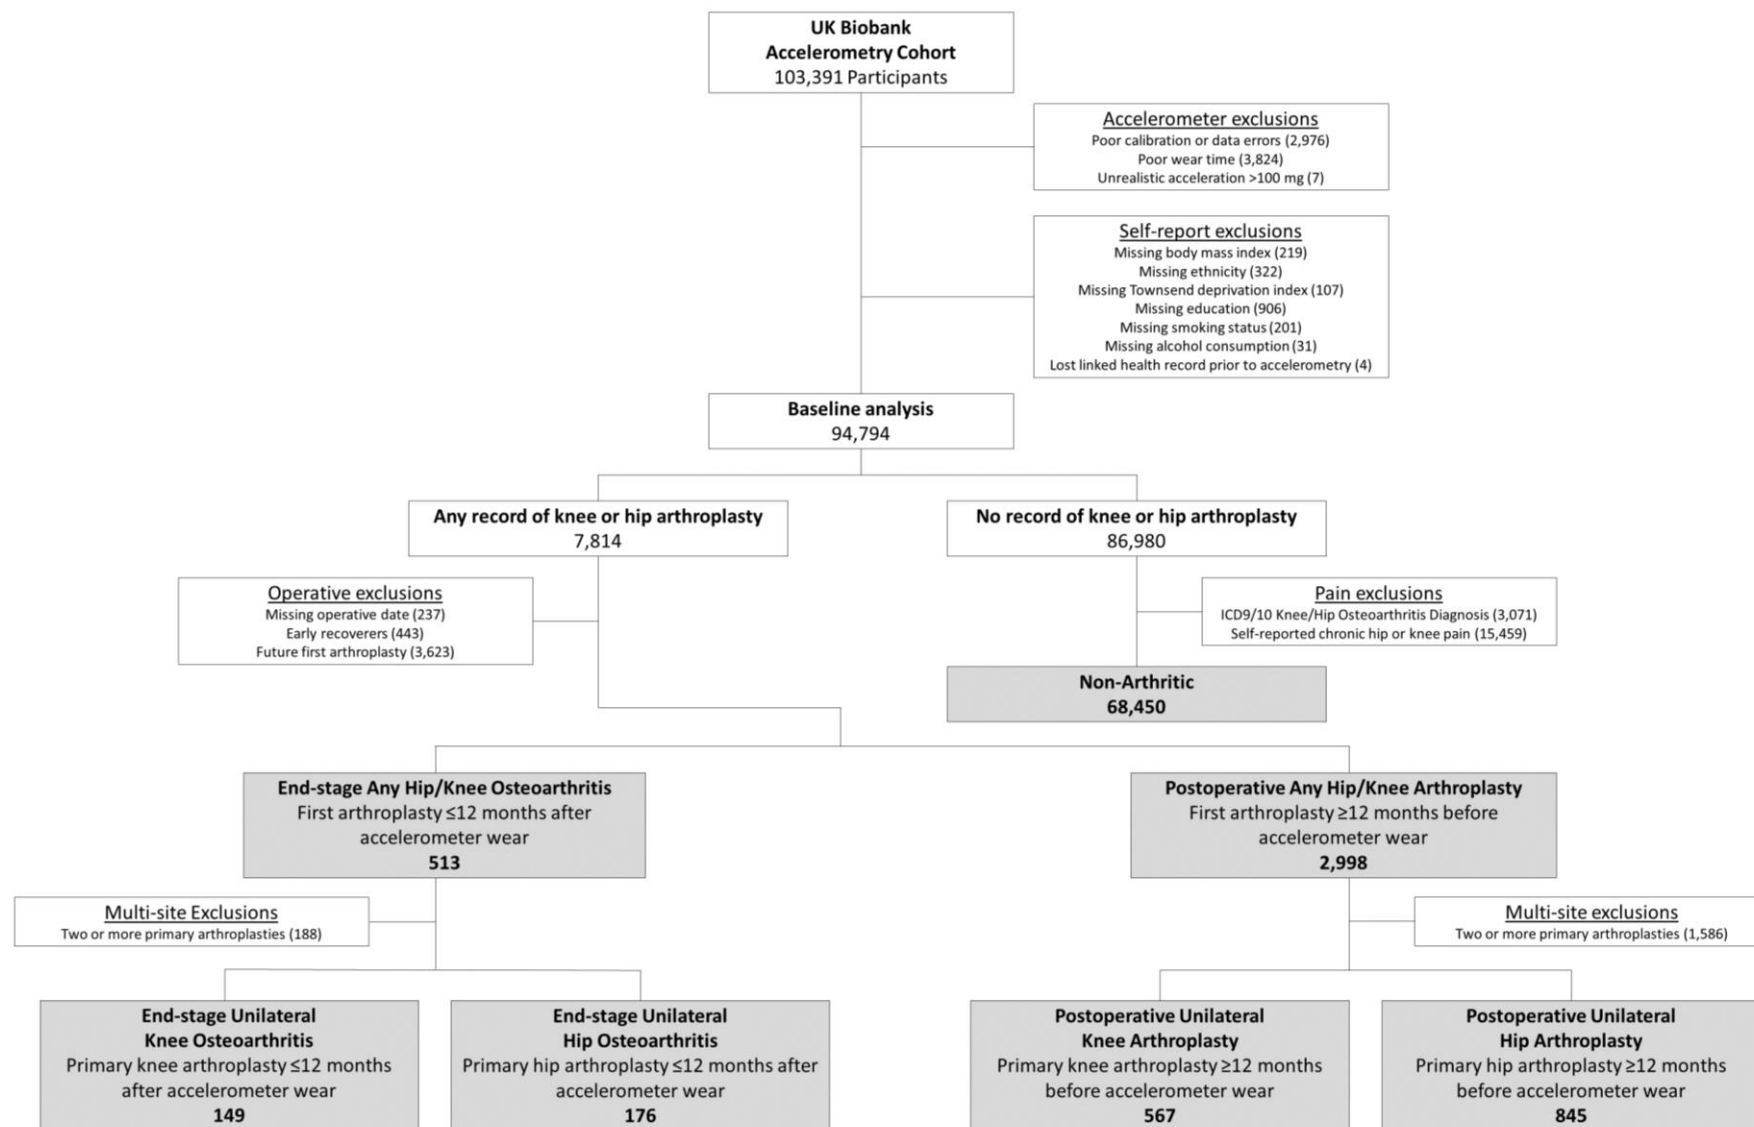

412

413

414

415

**Figure 1: Participant flow chart.** Non-arthritic and clinical participant subgroups based on operative status and timing relative to accelerometer wear date. Excluded early recoverers are considered participants who wore an accelerometer less than 12 months after their first primary hip or knee arthroplasty. Participants were also excluded if their first primary hip or knee arthroplasty was conducted more than 12 months after accelerometer wear.

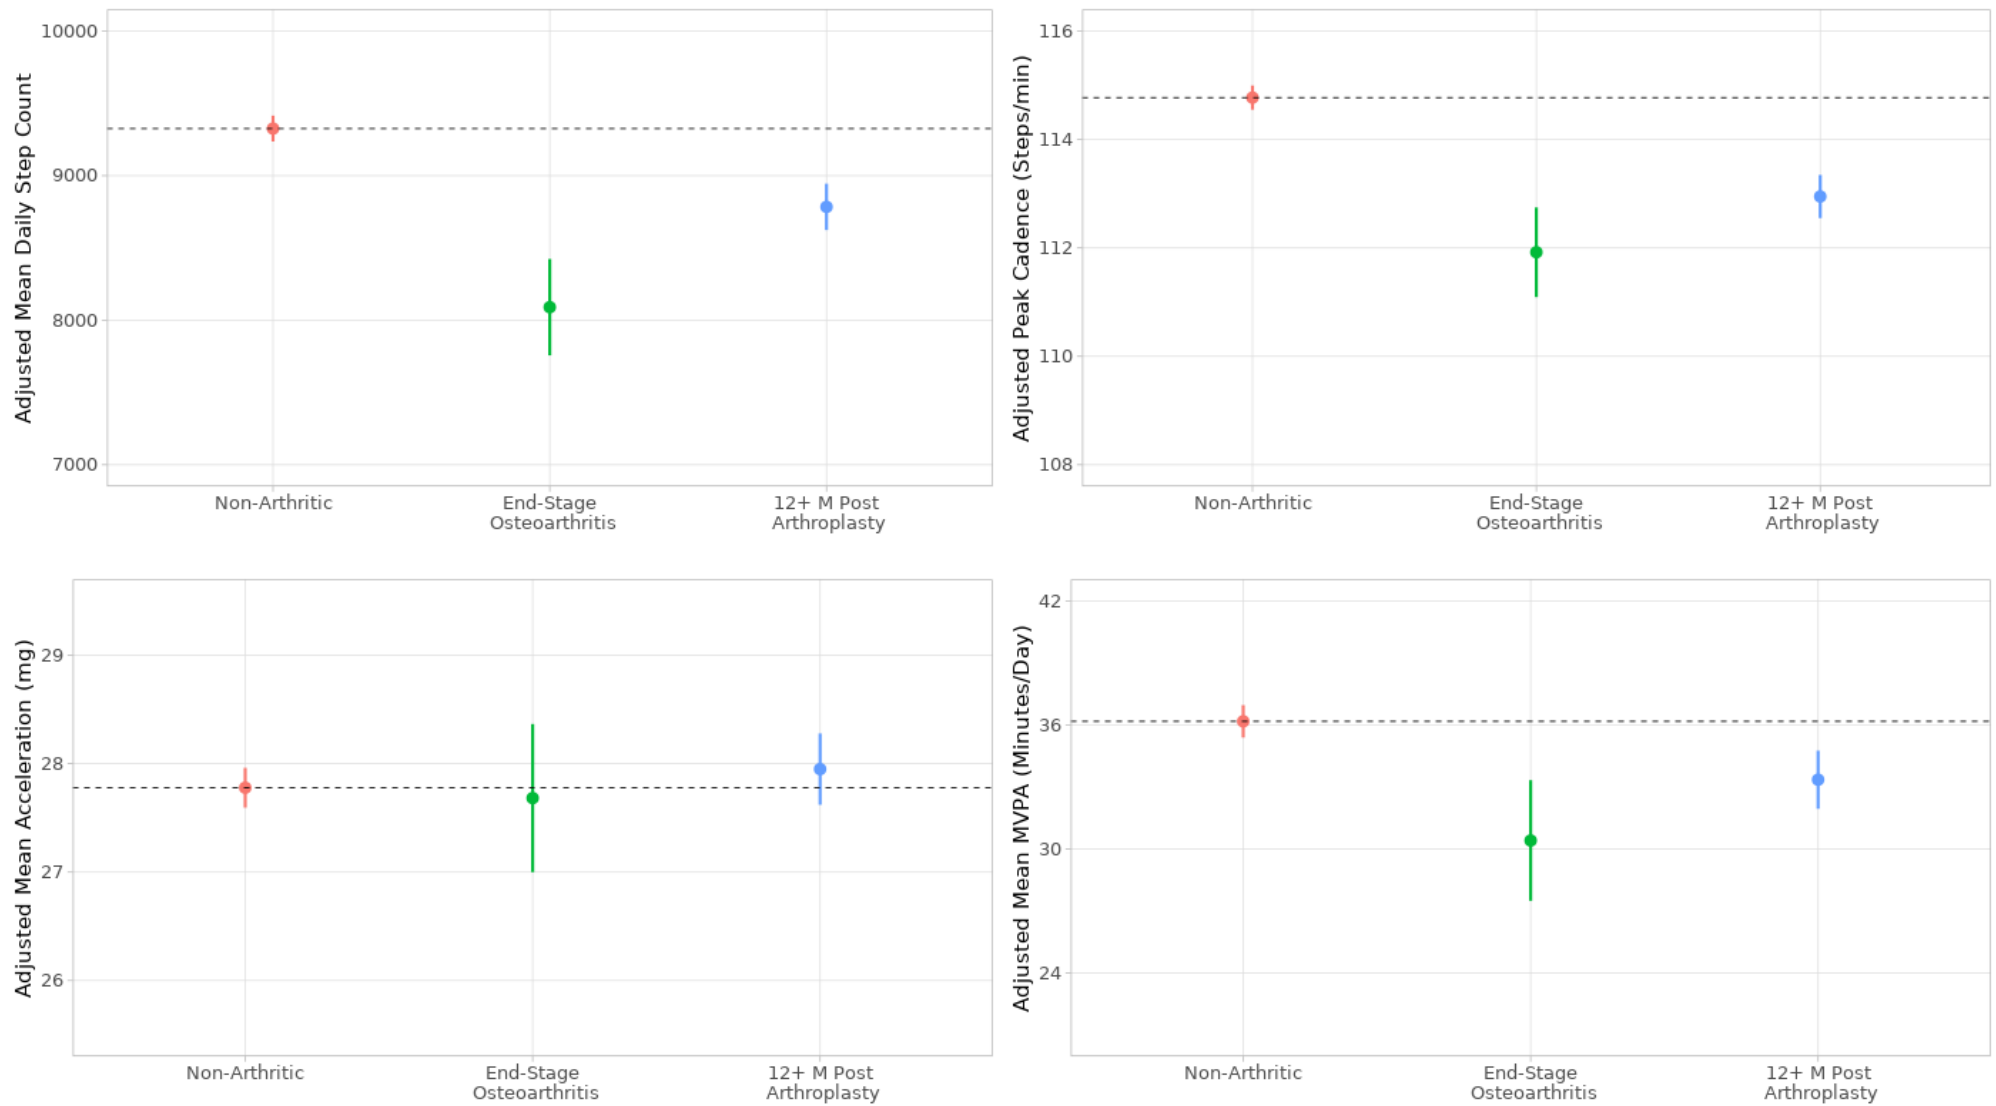

416

417 **Figure 2:** Estimated marginal means and 95% confidence intervals of activity and mobility metrics in participants who are non-arthritic, end-stage osteoarthritic, and more than 12 months  
 418 postoperative from first primary knee or hip arthroplasty. Metrics are adjusted for age, sex, body mass index, season, Charlson Comorbidity Index, education, ethnicity, alcohol consumption,  
 419 and smoking status.

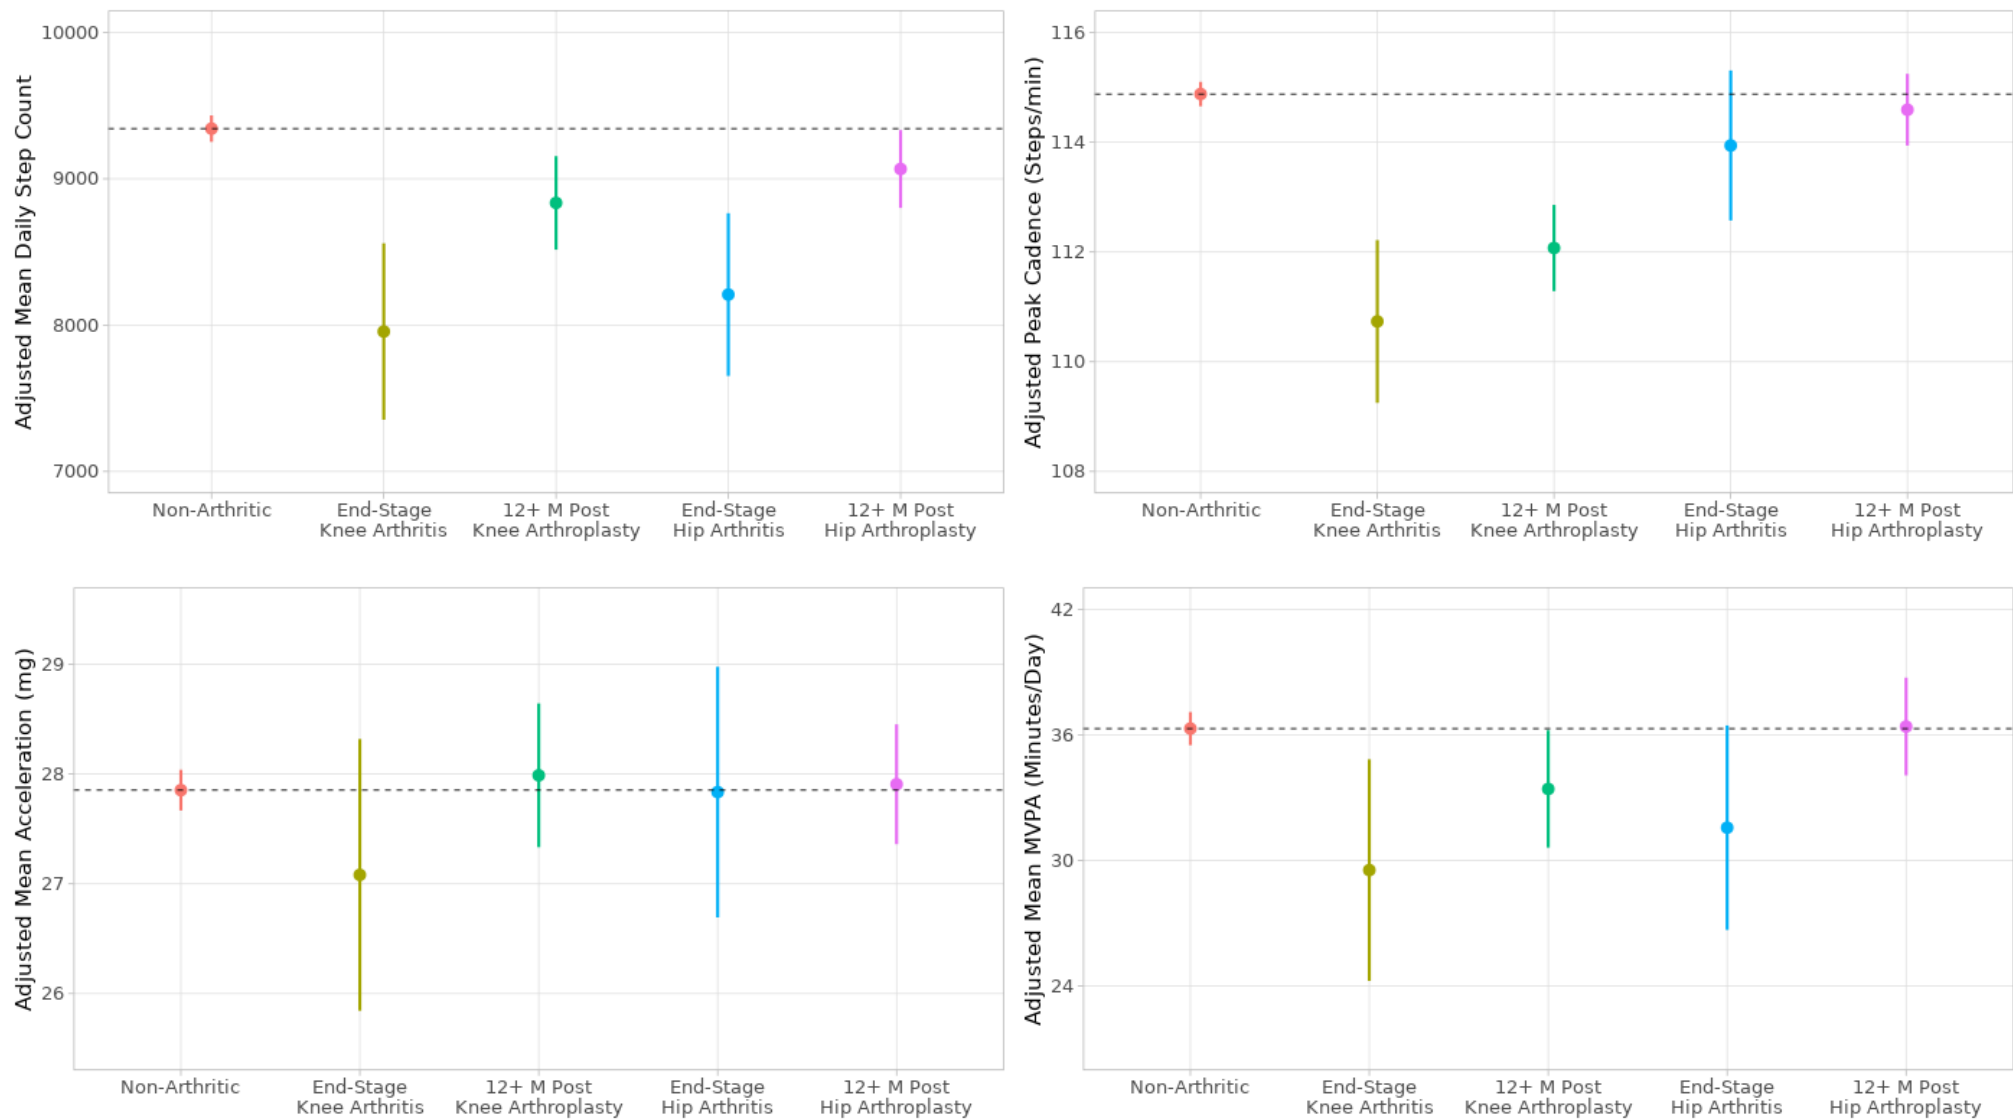

420

421

**Figure 3:** Estimated marginal means and 95% confidence intervals of activity and mobility metrics in participants who are non-arthritic, have end-stage knee osteoarthritis, are more than 12 months postoperative from unilateral primary knee arthroplasty, have end-stage hip osteoarthritis, or are more than 12 months postoperative from unilateral primary hip arthroplasty.

423

Metrics are adjusted for age, sex, body mass index, season, Charlson Comorbidity Index, education, ethnicity, alcohol consumption, and smoking status.
